# Supplementary material
Source: Elsevier journal article supplement (https://www.sciencedirect.com/science/article/pii/S1698031X19300640)
Supplement: mmc1 [file S1698031X19300640:mmc1.doc]

**ANEXO 1: Traducción al castellano del cuestionario EDITS**

**EDITS (Erectile Dysfunction Inventory of Treatment Satisfaction)**

*Cuestionario psicométrico para evaluación de la satisfacción con los tratamientos médicos para la disfunción eréctil.*

**VERSIÓN PARA EL PACIENTE**

Nombre o Número de identificación: ________________________________________

Fecha: ________________________

Método/s de tratamiento empleado/s: ________________________________________

*Las cuestiones en este test preguntan sobre un tema sensible, su vida sexual con su mujer o pareja y también sobre su actitud y expectativas hacia el método de tratamiento empleado para ayudarle con sus problemas de erección. Por favor, conteste a las preguntas de la manera más honesta y sincera posible. Si algunos términos o preguntas no le quedan claros, por favor pregunte para que se los aclaren.*

1. Globalmente, ¿cómo de satisfecho está con este tratamiento?
2. Muy satisfecho
3. Algo satisfecho
4. Ni satisfecho ni insatisfecho
5. Algo insatisfecho
6. Muy insatisfecho
7. Durante los pasadas 4 semanas, ¿hasta qué grado ha cumplido sus expectativas el tratamiento?
8. Completamente
9. Considerablemente
10. A medias
11. Un poco
12. Nada en absoluto
13. ¿Cómo de acuerdo estaría en continuar usando este tratamiento?
14. Muy de acuerdo
15. Moderadamente de acuerdo
16. Ni de acuerdo ni en desacuerdo
17. Moderadamente en desacuerdo
18. Muy en desacuerdo
19. Durante las pasadas 4 semanas, ¿cómo (de sencillo) ha sido para usted el uso del tratamiento?
20. Muy sencillo
21. Moderadamente sencillo
22. Ni sencillo ni difícil
23. Moderadamente difícil
24. Muy difícil
25. Durante las pasadas 4 semanas, cómo de satisfecho ha estado con la velocidad con la que actúa el tratamiento?
26. Muy satisfecho
27. Algo satisfecho
28. Ni satisfecho ni insatisfecho
29. Algo insatisfecho
30. Muy insatisfecho
31. Durante las pasadas 4 semanas, ¿cómo de satisfecho ha estado con la duración del efecto del tratamiento?
32. Muy satisfecho
33. Algo satisfecho
34. Ni satisfecho ni insatisfecho
35. Algo insatisfecho
36. Muy insatisfecho
37. ¿Cómo de confiado le hace sentir este tratamiento sobre su capacidad de participar de la actividad sexual?
38. Muy confiado
39. Algo confiado
40. No ha tenido impacto
41. Algo menos confiado
42. Mucho menos confiado
43. Globalmente, ¿cómo de satisfecha cree que está su pareja con los efectos de este tratamiento?
44. Muy satisfecha
45. Algo satisfecha
46. Ni satisfecha ni insatisfecha
47. Algo insatisfecha
48. Muy insatisfecha
49. ¿Cómo cree que opina su pareja sobre la posibilidad de continuar usando este tratamiento?
50. Estoy seguro de que mi pareja quiere que continúe
51. Posiblemente mi pareja prefiere que continúe
52. Mi pareja no tiene opinión
53. Mi pareja posiblemente prefiera que lo interrumpa
54. Estoy seguro de que mi pareja quiere que lo interrumpa
55. Durante las pasadas 4 semanas, ¿cómo de natural siente el proceso de conseguir una erección cuando está usando este tratamiento?
56. Muy natural
57. Algo natural
58. Ni natural ni antinatural
59. Algo antinatural
60. Muy antinatural
61. Durante las pasadas 4 semanas, *y en comparación con antes de tener un problema de erección* ¿cómo calificaría la naturaleza su erección en términos dureza?
62. Mucho más dura que antes de tener un problema de erección.
63. Algo más dura que antes de tener un problema de erección.
64. La misma dureza que antes de tener un problema de erección.
65. Algo menos dura que antes de tener un problema de erección.
66. Mucho menos dura que antes de tener un problema de erección.

***Muchas gracias por haber completado este cuestionario.***
